# Supplementary material for: Functioning Endocrine Outcome after Endoscopic Endonasal Transsellar Approach for Pituitary Neuroendocrine Tumors
Source: MDPI journal article supplement (doi:10.3390/jcm12082986), 2023-04-20
Supplement: s1 [file s1]

| N° PATIENTS | AGE AT SURGERY, years-old | GENDER | PREOPERATIVE PITUITARY FUNCTION AND HORMONAL RESULTS |                   |                 |              |              |              |              |              |              |              |              |              |                    |    |
|-------------|---------------------------|--------|------------------------------------------------------|-------------------|-----------------|--------------|--------------|--------------|--------------|--------------|--------------|--------------|--------------|--------------|--------------------|----|
|             |                           |        | PREOPERATIVE PITUITARY FUNCTION                      | FUNCTIONING TUMOR | HORMON RELEASED | CORTISOL     | ACTH         | FSH          | LH           | TEST/ESTR    | TSH          | GH           | IGF-1        | PRL          | INSIPIDUS DIABETES |    |
| 1           | 21                        | male   | altered                                              | yes               | PRL             | normal value | ↑                  | no |
| 2           | 53                        | male   | altered                                              | no                | 0               | ↓            | ↓            | normal value | normal value | normal value | ↓            | normal value | normal value | normal value | normal value       | no |
| 3           | 60                        | male   | normal                                               | no                | 0               | normal value       | no |
| 4           | 52                        | male   | altered                                              | yes               | GH              | normal value | ↑            | ↑            | normal value | normal value       | no |
| 5           | 53                        | female | altered                                              | yes               | GH              | normal value | ↑            | ↑            | normal value | normal value       | no |
| 6           | 57                        | male   | altered                                              | no                | 0               | normal value | normal value | normal value | ↓            | ↓            | normal value | normal value | ↓            | normal value | normal value       | no |
| 7           | 43                        | male   | altered                                              | no                | 0               | normal value | normal value | normal value | ↓            | ↓            | normal value       | no |
| 8           | 46                        | male   | normal                                               | no                | 0               | normal value       | no |
| 9           | 43                        | female | altered                                              | no                | 0               | ↓            | ↓            | normal value | normal value | normal value | normal value | ↓            | ↓            | ↓            | ↓                  | no |
| 10          | 49                        | male   | normal                                               | no                | 0               | normal value       | no |
| 11          | 67                        | female | normal                                               | no                | 0               | normal value       | no |
| 12          | 40                        | male   | altered                                              | yes               | PRL             | normal value | normal value | normal value | normal value | ↓            | normal value | ↓            | ↓            | ↑            | ↑                  | no |
| 13          | 47                        | male   | altered                                              | no                | 0               | normal value | ↓                  | no |
| 14          | 33                        | male   | altered                                              | yes               | TSH             | normal value | ↑            | normal value | normal value | normal value | normal value       | no |
| 15          | 57                        | male   | normal                                               | no                | 0               | normal value       | no |
| 16          | 69                        | female | normal                                               | no                | 0               | normal value       | no |
| 17          | 50                        | female | altered                                              | yes               | ACTH            | ↑            | ↑            | normal value       | no |
| 18          | 70                        | female | normal                                               | no                | 0               | normal value       | no |
| 19          | 63                        | female | altered                                              | no                | 0               | ↑            | ↑            | normal value | normal value | normal value | ↓            | normal value | normal value | normal value | normal value       | no |
| 20          | 49                        | male   | altered                                              | no                | 0               | normal value | ↓            | normal value | normal value | normal value | normal value       | no |
| 21          | 71                        | male   | normal                                               | no                | 0               | normal value       | no |
| 22          | 58                        | female | altered                                              | yes               | PRL             | normal value | ↑            | ↑                  | no |
| 23          | 35                        | male   | altered                                              | yes               | PRL             | ↓            | ↓            | normal value | ↓            | ↓            | ↓            | normal value | normal value | ↑            | ↑                  | no |
| 24          | 73                        | female | normal                                               | no                | 0               | normal value | normal value | normal value | ↓            | normal value | ↓            | normal value | normal value | ↑            | ↑                  | no |
| 25          | 65                        | male   | altered                                              | no                | 0               | ↓            | ↓            | normal value | normal value | normal value | ↓            | normal value | normal value | normal value | normal value       | no |
| 26          | 74                        | female | altered                                              | no                | 0               | normal value | ↑            | ↑                  | no |
| 27          | 72                        | male   | altered                                              | no                | 0               | ↓            | ↓            | ↓            | ↓            | ↓            | ↓            | ↓            | ↓            | ↓            | ↓                  | no |
| 28          | 73                        | female | normal                                               | no                | 0               | normal value       | no |
| 29          | 67                        | female | normal                                               | no                | 0               | normal value       | no |
| 30          | 64                        | female | altered                                              | yes               | PRL             | normal value | ↑            | ↑                  | no |
| 31          | 53                        | male   | altered                                              | yes               | GH              | normal value | ↓            | ↑            | ↑            | normal value | normal value       | no |
| 32          | 55                        | male   | altered                                              | no                | 0               | normal value | normal value | ↓            | ↓            | ↑            | normal value       | no |
| 33          | 77                        | male   | normal                                               | no                | 0               | normal value       | no |
| 34          | 30                        | female | altered                                              | no                | 0               | normal value | ↑            | ↑                  | no |
| 35          | 69                        | male   | altered                                              | yes               | GH              | normal value | ↑            | ↑            | normal value | normal value       | no |
| 36          | 51                        | male   | altered                                              | yes               | GH              | normal value | ↑            | ↑            | normal value | normal value       | no |
| 37          | 72                        | female | altered                                              | yes               | GH              | normal value | ↑            | ↑            | normal value | normal value       | no |
| 38          | 64                        | female | altered                                              | yes               | GH              | normal value | ↑            | ↑            | normal value | normal value       | no |
| 39          | 42                        | female | altered                                              | yes               | PRL             | ↓            | normal value | ↑            | ↑                  | no |
| 40          | 69                        | male   | altered                                              | no                | 0               | ↓            | ↓            | ↓            | ↓            | ↓            | normal value       | no |
| 41          | 66                        | male   | altered                                              | no                | 0               | normal value       | no |
| 42          | 67                        | female | normal                                               | no                | 0               | normal value       | no |
| 43          | 79                        | male   | normal                                               | no                | 0               | normal value       | no |
| 44          | 25                        | female | altered                                              | yes               | PRL             | normal value | normal value | ↓            | normal value | ↓            | normal value | normal value | normal value | ↑            | ↑                  | no |
| 45          | 69                        | male   | normal                                               | no                | 0               | normal value       | no |

[illegible]
